# Supplementary material
Source: publisher site journal article supplement (https://www.dovepress.com/get_supplementary_file.php?f=485091.docx)
Supplement: Supplementary file 1 [file get_supplementary_file.php]

**
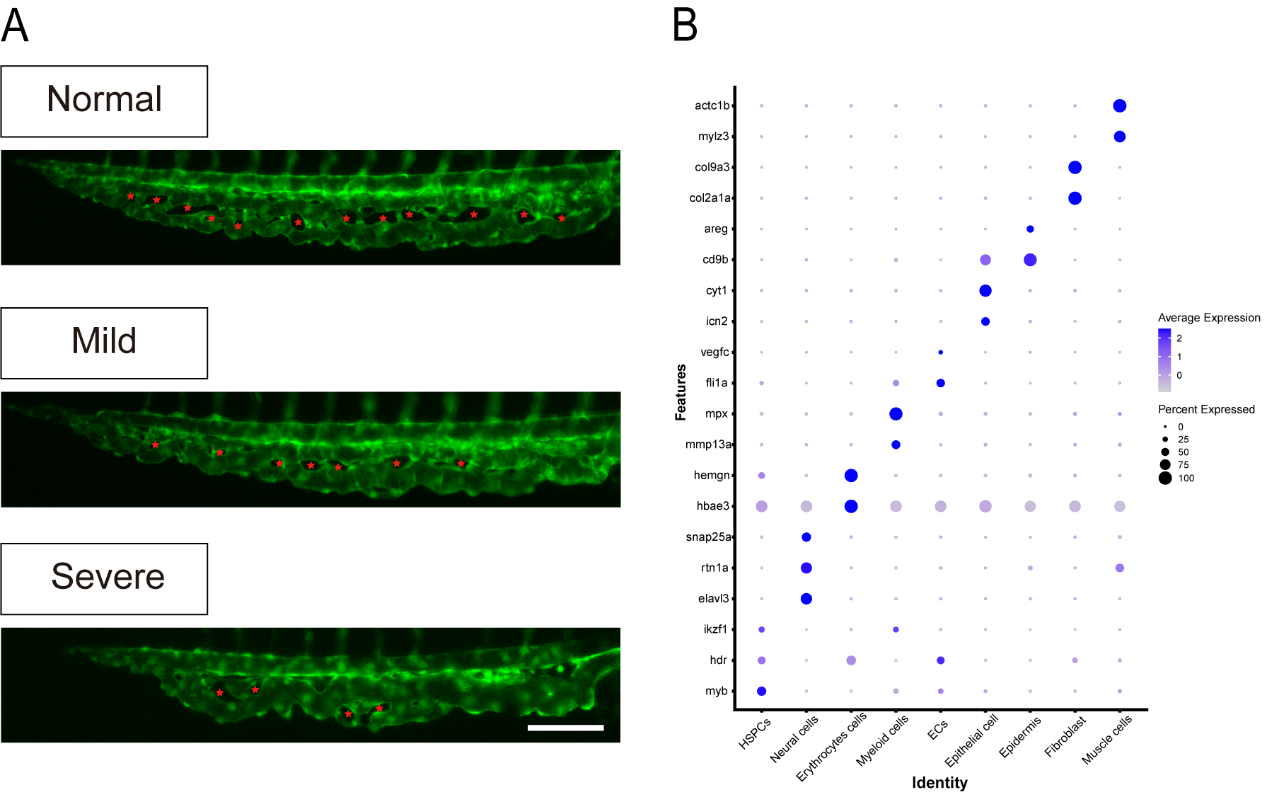
Supplementary Figure 1. Categorization of CVP vascular abnormalities in zebrafish embryos following a 46-hour exposure to nanoplastics.**

(A) Representative image of zebrafish embryo with CVP malformation. Normal: the loop numbers more than fifteen; Mild: the loop numbers more than five and less than fifteen; Severe: the loop numbers less than five. Red asterisks, the loop structure. Scale bar, 100 μm. (B) Identification of cell subgroups in the tail tissue of zebrafish.
